# Supplementary material for: Simultaneous Analysis of 53 Pesticides in Safflower (Carthamus tinctorius L.) by Using LC–MS/MS Coupled with a Modified QuEChERS Technique
Source: MDPI journal article supplement (doi:10.3390/toxics11060537), 2023-06-16
Supplement: s1 [file s1]

# Simultaneous Analysis of 53 Pesticides in Safflower (*Carthamus tinctorius* L.) by using LC–MS/MS Coupled with a Modified QuEChERS Technique

Wei Song <sup>1,2,\*</sup>, Chuanyi Peng <sup>2,3,†</sup>, Yuxin Liu <sup>1,2</sup>, Fang Han <sup>1,2</sup>, Haitao Zhu <sup>1,2</sup>, Dianbing Zhou <sup>1,2</sup>, Yu Wang <sup>1,2</sup>, Lijun Chen <sup>1,2</sup>, Xiaodi Meng <sup>1,2</sup> and Ruyan Hou <sup>2,3</sup>

Table S1. MS parameters of 53 pesticides.

| Pesticide           | Qualitative Ion Pair | Quantitative Ion Pair | FP(V) | CE (eV) | RT   |
|---------------------|----------------------|-----------------------|-------|---------|------|
| Carbendazim         | 192.1/160            | 192.1/132             | 118   | 13,25   | 2.8  |
| Thiabendazole       | 202/175              | 202/131               | 120   | 30,30   | 3.0  |
| Thiophanate-Methyl  | 343/311              | 343/151               | 120   | 10,20   | 5.6  |
| Simetryn            | 214/144              | 214/124               | 120   | 20,20   | 5.2  |
| Terbumeton          | 226.2/170            | 226.2/114             | 120   | 15,20   | 5.7  |
| Rabenzazole         | 213.1/172            | 213.1/118             | 122   | 21,37   | 6.5  |
| Carbofuran          | 222/165.1            | 222/123               | 92    | 8,16    | 6.1  |
| Carbaryl            | 202/145              | 202/127               | 80    | 5,10    | 6.4  |
| Thiofanox           | 241/184              | 241/57.1              | 100   | 5,20    | 6.6  |
| Cycluron            | 199.1/89.1           | 199.1/72.2            | 106   | 13,21   | 6.6  |
| Methoprotryne       | 272.2/198.1          | 272.2/170.1           | 140   | 20,30   | 6.6  |
| Ametryn             | 228/186              | 228/96                | 120   | 20,25   | 6.7  |
| Norflurazon         | 304/284              | 304/160               | 140   | 25,35   | 7.2  |
| Pyrimethanil        | 200.2/168.1          | 200.2/107             | 41    | 40,34   | 7.6  |
| Chlorantraniliprole | 484/453              | 484/286               | 102   | 13,10   | 8.4  |
| Prometryn           | 242.2/200.2          | 242.2/158.1           | 120   | 20,20   | 8.7  |
| Flonicamid          | 230/203.1            | 230/174.1             | 120   | 13,17   | 9.0  |
| Mefenacet           | 299/148              | 299/120               | 100   | 15,25   | 11.1 |
| Cyprodinil          | 226.1/118            | 226.1/93.1            | 152   | 49,37   | 11.9 |
| Mandipropamid       | 412.1/328            | 421.1/125             | 100   | 10,40   | 12.0 |
| Bupirimate          | 317/272              | 317/166               | 120   | 20,25   | 12.6 |
| Metconazole         | 320/125              | 320/70                | 110   | 40,25   | 12.8 |
| Isazofos            | 314.1/162.1          | 314.1/120             | 120   | 15,20   | 12.9 |
| Rotenone            | 395.1/213            | 395.1/192             | 130   | 20,25   | 13.4 |
| Triflumuron         | 359/156              | 359/139               | 120   | 15,25   | 14.6 |
| Difenoconazole      | 406/337              | 406/251               | 160   | 15,20   | 14.9 |
| Diazinon            | 305.1/169            | 305.1/153             | 140   | 20,20   | 15.0 |
| Triflumizole        | 346/278              | 346/73                | 80    | 5,10    | 15.2 |
| Myclobutanil        | 289.2/125            | 289.2/70              | 60    | 35,15   | 10.9 |
| 3-Hydroxycarbofuran | 238/163              | 238/181               | 69    | 8,4     | 3.6  |
| Aldicarb            | 208.1/116            | 208.1/89.1            | 62    | 5,13    | 2.4  |
| aldicarb sulfone    | 223/148              | 223/86                | 111   | 4,12    | 2.7  |
| aldicarb sulfoxide  | 207/132              | 207/89                | 77    | 4,10    | 2.3  |
| Fenobucarb          | 208.2/152.1          | 208.2/95              | 80    | 5,10    | 9.0  |
| Isoprocarb          | 194.1/137            | 194.1/95              | 75    | 5,10    | 7.4  |
| Methomyl            | 163.2/106            | 163.2/42.1            | 50    | 8,20    | 3.1  |
| Metolcarb           | 166.1/109            | 166.1/91              | 80    | 5,10    | 15.8 |
| Propoxur            | 210/168              | 210/111               | 80    | 5,10    | 5.7  |
| Imidacloprid        | 256.1/209            | 256.1/175.1           | 106   | 13,13   | 3.8  |

|              |             |             |     |       |      |
|--------------|-------------|-------------|-----|-------|------|
| Thiamethoxam | 292/181.03  | 292/108     | 80  | 20,29 | 3.2  |
| Clothianidin | 250.2/169.1 | 250.2/132   | 80  | 10,15 | 3.6  |
| Thiacloprid  | 253/186     | 253/126     | 120 | 10,15 | 4.6  |
| Acetamiprid  | 223.1/126   | 223.1/90    | 102 | 21,13 | 4.0  |
| Chlorpyrifos | 350/198     | 350/97.1    | 100 | 15,30 | 17.8 |
| Fenthion     | 279/247     | 279/169     | 100 | 10,15 | 14.8 |
| Coumaphos    | 363/307     | 363/227     | 120 | 15,20 | 15.7 |
| Propachlor   | 212.1/170   | 212.1/152   | 80  | 10,15 | 4.4  |
| Atrazine     | 216/174     | 216/132     | 100 | 15,20 | 6.5  |
| Acetochlor   | 270.1/224   | 270.1/148   | 90  | 5,20  | 12.7 |
| Metolachlor  | 284.2/252.2 | 284.2/176.2 | 90  | 8,24  | 12.4 |
| Dimethenamid | 276.1/244   | 276.1/168   | 120 | 10,15 | 9.7  |
| Alachlor     | 270/238     | 270/162     | 80  | 10,20 | 12.6 |
| Butachlor    | 312.1/238   | 312.1/162   | 80  | 10,20 | 17.5 |

**Table S2.** Standard quantitative curves of 53 pesticides.

| Pesticide           | Linear Regression Equation | Correlation Coefficient (R <sup>2</sup> ) |
|---------------------|----------------------------|-------------------------------------------|
| Carbendazim         | y=2272.1x+1086.9           | 0.9995                                    |
| Thiabendazole       | y=1802.3x+1718.3           | 0.9997                                    |
| Thiophanate-Methyl  | y=926.4x+285.6             | 0.9983                                    |
| Simetryn            | y=1741.5x+51.7             | 1.0000                                    |
| Terbumeton          | y=1453.4x-454.6            | 0.9991                                    |
| Rabenzazole         | y=366.2x+47.2              | 0.9979                                    |
| Carbofuran          | y=1541.8x-126.8            | 0.9999                                    |
| Carbaryl            | y=1761.3x+143.9            | 0.9988                                    |
| Thiofanox           | y=155.5x-13.4              | 0.9993                                    |
| Cycluron            | y=657.3x+43.3              | 0.9991                                    |
| Methoprottryne      | y=1815.8x+84.0             | 0.9985                                    |
| Ametryn             | y=1301.5x+67.8             | 0.9998                                    |
| Norflurazon         | y=863.2x+81.5              | 0.9992                                    |
| Pyrimethanil        | y=247.3x+147.2             | 0.9999                                    |
| Chlorantraniliprole | y=593.2x+318.1             | 0.9982                                    |
| Prometryn           | y=2128.5x+451.5            | 0.9998                                    |
| Flonicamid          | y=353.7x-245.8             | 0.9986                                    |
| Mefenacet           | y=1317.1x-16.4             | 1.0000                                    |
| Cyprodinil          | y=468.0x+11.7              | 0.9999                                    |
| Mandipropamid       | y=855.9x+160.8             | 0.9989                                    |
| Bupirimate          | y=593.7x+35.2              | 0.9985                                    |
| Metconazole         | y=362.2x+102.8             | 0.9993                                    |
| Isazofos            | y=1912.1x+1245.8           | 0.9983                                    |
| Rotenone            | y=651.5x+223.5             | 0.9994                                    |
| Triflumuron         | y=931.1x+125.6             | 0.9991                                    |
| Difenoconazole      | y=347.5x-36.0              | 0.9988                                    |
| Diazinon            | y=820.6x-371.0             | 0.9995                                    |
| Triflumizole        | y=2049.5x+848.2            | 0.9998                                    |
| Myclobutanil        | y=778.2x+363.8             | 0.9994                                    |
| 3-Hydroxycarbofuran | y=514.2x-260.8             | 0.9989                                    |
| Aldicarb            | y=653.4x+405.9             | 0.9991                                    |
| aldicarb sulfone    | y=498.6x-265.6             | 0.9978                                    |
| aldicarb sulfoxide  | y=641.7x+421.6             | 0.9981                                    |
| Fenobucarb          | y=661.3x+55.0              | 0.9998                                    |
| Isoprocarb          | y=2203.1x+38.5             | 0.9991                                    |

|              |                   |        |
|--------------|-------------------|--------|
| Methomyl     | $y=1398.4x+148.9$ | 0.9987 |
| Metolcarb    | $y=1408.8x-44.4$  | 0.9990 |
| Propoxur     | $y=2328.1x+55.1$  | 0.9999 |
| Imidacloprid | $y=364.6x+821.4$  | 0.9976 |
| Thiamethoxam | $y=593.3x+120.7$  | 0.9992 |
| Clothianidin | $y=364.8x+184.1$  | 0.9985 |
| Thiacloprid  | $y=1136.4x+779.2$ | 0.9979 |
| Acetamiprid  | $y=852.6x-41.8$   | 0.9982 |
| Chlorpyrifos | $y=214.3x-79.8$   | 0.9989 |
| Fenthion     | $y=331.6x-239.2$  | 0.9981 |
| Coumaphos    | $y=304.3x+108.1$  | 0.9983 |
| Propachlor   | $y=1482.2x+150.3$ | 0.9998 |
| Atrazine     | $y=628.8x+108.6$  | 0.9996 |
| Acetochlor   | $y=554.9x-362.3$  | 0.9992 |
| Metolachlor  | $y=1832.2x+13.8$  | 0.9989 |
| Dimethenamid | $y=1517.2x+98.8$  | 0.9996 |
| Alachlor     | $y=415.4x-111.2$  | 0.9991 |
| Butachlor    | $y=303.2x-15.6$   | 0.9993 |

---
